# Supplementary material
Source: publisher figshare collection journal article supplement (https://acs.figshare.com/ndownloader/files/17859422)
Supplement: Supplementary file 1 [file 17859422]

## Supporting Information

Mitochondrial Glutathione Transferase Zeta 1 is Inactivated More Rapidly by Dichloroacetate than the Cytosolic Enzyme in Adult and Juvenile Rat Liver

Marci G. Smeltz<sup>§</sup>, Zhiwei Hu<sup>§</sup>, Guo Zhong<sup>§</sup>, Stephan C. Jahn<sup>§</sup>, Laura Rowland-Faux<sup>§</sup>, Lloyd P. Horne<sup>¥</sup>, Peter W. Stacpoole<sup>¥#</sup>, and Margaret O. James<sup>§\*</sup>

<sup>§</sup>Department of Medicinal Chemistry, College of Pharmacy, and <sup>¥</sup>Departments of Medicine and <sup>#</sup>Biochemistry and Molecular Biology, College of Medicine, University of Florida, Gainesville, Florida

Corresponding Author: Margaret O. James, Department of Medicinal Chemistry, PO Box 100485, University of Florida, Gainesville, FL 32610-0485

Phone: 1 352 273 7707      Email: mojames@ufl.edu

## Table of Contents

The supporting information presents details of the results described in the manuscript.

|                                                                                                                                                                              |         |
|------------------------------------------------------------------------------------------------------------------------------------------------------------------------------|---------|
| <b>Table S1.</b> Average GSTZ1 activity with DCA measured in liver cytosol and mitochondria of young rats.....                                                               | Page S2 |
| <b>Table S2.</b> Average GSTZ1 activity with DCA measured in liver cytosol and mitochondria of adult rats.....                                                               | Page S3 |
| <b>Table S3.</b> Average GSTZ1 expression levels in cytosol and mitochondria of young rats.....                                                                              | Page S4 |
| <b>Table S4.</b> Average GSTZ1 expression levels in cytosol and mitochondria of adult rats.....                                                                              | Page S5 |
| <b>Figure S1:</b> Relationship between GSTZ1 protein expression and activity.....                                                                                            | Page S6 |
| <b>Figure S2:</b> DCA concentrations in liver, cytosol and mitochondria of young (blue circles) and adult (black squares) rats at different times after the dose of DCA..... | Page S7 |
| <b>Figure S3:</b> Data for liver to body weight ratio in control (sodium acetate-treated) rats over the 24 hour period after the dose...                                     | Page S8 |

**Figure S4:** GSTZ1 activity with DCA as substrate in control rats at the times shown after the dose of sodium acetate.....Page S9

**Figure S5:** GSTZ1 expression in control rats at the times shown after the dose of sodium acetate.....Page S10

**Table S1.** Average GSTZ1 activity with DCA measured in liver cytosol and mitochondria of young rats.

| <b>Time (h)</b> | <b>Cytosolic GSTZ1 Activity<br/>(nmol glyoxalate/min/mg)</b> |                           | <b>Mitochondrial GSTZ1 Activity<br/>(nmol glyoxalate/min/mg)</b> |                           |
|-----------------|--------------------------------------------------------------|---------------------------|------------------------------------------------------------------|---------------------------|
|                 | <b><i>Control</i></b>                                        | <b><i>DCA-Treated</i></b> | <b><i>Control</i></b>                                            | <b><i>DCA-Treated</i></b> |
| <b>0.25</b>     |                                                              | 1.97 ± 0.19               |                                                                  | 0.133 ± 0.008             |
| <b>0.5</b>      | 2.20 ± 0.43                                                  | 1.56 ± 0.15               | 0.192 ± 0.026                                                    | 0.117 ± 0.017             |
| <b>1</b>        | 2.53 ± 0.31                                                  | 0.98 ± 0.29               | 0.268 ± 0.031                                                    | 0.068 ± 0.015             |
| <b>2</b>        | 2.10 ± 0.66                                                  | 0.66 ± 0.18               | 0.341 ± 0.040                                                    | 0.037 ± 0.012             |
| <b>4</b>        | 2.02 ± 0.37                                                  | 0.22 ± 0.17               | 0.391 ± 0.049                                                    | 0.024 ± 0.005             |
| <b>8</b>        | 2.61 ± 0.54                                                  | 0.09 ± 0.02               | 0.229 ± 0.034                                                    | 0.036 ± 0.012             |
| <b>12</b>       | 2.32 ± 0.61                                                  | 0.27 ± 0.17               | 0.297 ± 0.041                                                    | 0.026 ± 0.006             |
| <b>24</b>       | 2.46 ± 0.32                                                  | 0.36 ± 0.19               | 0.364 ± 0.040                                                    | 0.038 ± 0.017             |

Values are presented as mean ± SD, n=6, for each DCA-treatment (8 h treated, n=5) and control time points for rat cytosol and mitochondria.

**Table S2.** Average GSTZ1 activity with DCA measured in liver cytosol and mitochondria of adult rats.

| <b>Time (h)</b> | <b>Cytosolic GSTZ1 Activity<br/>(nmol glyoxalate/min/mg)</b> |                           | <b>Mitochondrial GSTZ1 Activity<br/>(nmol glyoxalate/min/mg)</b> |                           |
|-----------------|--------------------------------------------------------------|---------------------------|------------------------------------------------------------------|---------------------------|
|                 | <b><i>Control</i></b>                                        | <b><i>DCA-Treated</i></b> | <b><i>Control</i></b>                                            | <b><i>DCA-Treated</i></b> |
| <b>0.25</b>     |                                                              | 1.54 ± 0.45               |                                                                  | 0.245 ± 0.051             |
| <b>0.5</b>      | 1.51 ± 0.32                                                  | 1.10 ± 0.25               | 0.468 ± 0.089                                                    | 0.222 ± 0.056             |
| <b>1</b>        | 2.39 ± 0.71                                                  | 0.82 ± 0.22               | 0.495 ± 0.067                                                    | 0.110 ± 0.020             |
| <b>2</b>        | 3.03 ± 0.53                                                  | 0.43 ± 0.19               | 0.548 ± 0.072                                                    | 0.047 ± 0.010             |
| <b>4</b>        | 2.72 ± 0.33                                                  | 0.09 ± 0.02               | 0.572 ± 0.044                                                    | 0.024 ± 0.007             |
| <b>8</b>        | 2.22 ± 0.30                                                  | 0.08 ± 0.01               | 0.444 ± 0.052                                                    | 0.029 ± 0.004             |
| <b>12</b>       | 1.89 ± 0.31                                                  | 0.08 ± 0.01               | 0.516 ± 0.085                                                    | 0.025 ± 0.004             |
| <b>24</b>       | 2.16 ± 0.46                                                  | 0.15 ± 0.10               | 0.432 ± 0.074                                                    | 0.023 ± 0.007             |

Values are presented as mean ± SD, n=6 (8 h time point, n=5), for each DCA-treatment and control (1 and 4 h control, n=5) time points for rat cytosol and mitochondria.

**Table S3.** Average GSTZ1 expression levels in cytosol and mitochondria of young rats.

| <b>Time (h)</b> | <b>Cytosolic GSTZ1 Expression</b><br>(ng GSTZ1/ $\mu$ g protein) |                    | <b>Mitochondrial GSTZ1 Expression</b><br>(ng GSTZ1/ $\mu$ g protein) |                    |
|-----------------|------------------------------------------------------------------|--------------------|----------------------------------------------------------------------|--------------------|
|                 | <i>Control</i>                                                   | <i>DCA-Treated</i> | <i>Control</i>                                                       | <i>DCA-Treated</i> |
| <b>0.25</b>     |                                                                  | 0.662 $\pm$ 0.094  |                                                                      | 0.070 $\pm$ 0.015  |
| <b>0.5</b>      | 0.690 $\pm$ 0.114                                                | 0.581 $\pm$ 0.107  | 0.074 $\pm$ 0.015                                                    | 0.058 $\pm$ 0.018  |
| <b>1</b>        | 0.544 $\pm$ 0.096                                                | 0.374 $\pm$ 0.112  | 0.126 $\pm$ 0.022                                                    | 0.032 $\pm$ 0.011  |
| <b>2</b>        | 0.581 $\pm$ 0.170                                                | 0.281 $\pm$ 0.060  | 0.143 $\pm$ 0.033                                                    | 0.030 $\pm$ 0.002  |
| <b>4</b>        | 0.606 $\pm$ 0.176                                                | 0.171 $\pm$ 0.105  | 0.140 $\pm$ 0.017                                                    | 0.019 $\pm$ 0.006  |
| <b>8</b>        | 0.716 $\pm$ 0.189                                                | 0.167 $\pm$ 0.072  | 0.096 $\pm$ 0.014                                                    | 0.021 $\pm$ 0.006  |
| <b>12</b>       | 0.569 $\pm$ 0.139                                                | 0.104 $\pm$ 0.053  | 0.125 $\pm$ 0.056                                                    | 0.010 $\pm$ 0.003  |
| <b>24</b>       | 0.690 $\pm$ 0.054                                                | 0.089 $\pm$ 0.049  | 0.135 $\pm$ 0.036                                                    | 0.012 $\pm$ 0.011  |

Values are presented as mean  $\pm$  SD, n=6, for each DCA-treatment (8 h treated, n=5) and control time points for rat cytosol and mitochondria.

**Table S4.** Average GSTZ1 expression levels in cytosol and mitochondria of adult rats.

| <b>Time (h)</b> | <b>Cytosolic GSTZ1 Expression</b><br>(ng GSTZ1/ $\mu$ g protein) |                    | <b>Mitochondrial GSTZ1 Expression</b><br>(ng GSTZ1/ $\mu$ g protein) |                    |
|-----------------|------------------------------------------------------------------|--------------------|----------------------------------------------------------------------|--------------------|
|                 | <i>Control</i>                                                   | <i>DCA-Treated</i> | <i>Control</i>                                                       | <i>DCA-Treated</i> |
| <b>0.25</b>     |                                                                  | 0.516 $\pm$ 0.114  |                                                                      | 0.092 $\pm$ 0.019  |
| <b>0.5</b>      | 0.497 $\pm$ 0.110                                                | 0.506 $\pm$ 0.139  | 0.093 $\pm$ 0.024                                                    | 0.127 $\pm$ 0.028  |
| <b>1</b>        | 0.598 $\pm$ 0.088                                                | 0.379 $\pm$ 0.052  | 0.216 $\pm$ 0.037                                                    | 0.076 $\pm$ 0.019  |
| <b>2</b>        | 0.667 $\pm$ 0.067                                                | 0.282 $\pm$ 0.114  | 0.212 $\pm$ 0.034                                                    | 0.062 $\pm$ 0.029  |
| <b>4</b>        | 0.601 $\pm$ 0.074                                                | 0.098 $\pm$ 0.040  | 0.185 $\pm$ 0.038                                                    | 0.026 $\pm$ 0.007  |
| <b>8</b>        | 0.593 $\pm$ 0.119                                                | 0.133 $\pm$ 0.048  | 0.134 $\pm$ 0.045                                                    | 0.024 $\pm$ 0.012  |
| <b>12</b>       | 0.541 $\pm$ 0.083                                                | 0.060 $\pm$ 0.033  | 0.150 $\pm$ 0.032                                                    | 0.016 $\pm$ 0.004  |
| <b>24</b>       | 0.554 $\pm$ 0.075                                                | 0.087 $\pm$ 0.054  | 0.120 $\pm$ 0.021                                                    | 0.018 $\pm$ 0.012  |

Values are presented as mean  $\pm$  SD, n=6 (8 h time point, n=5), for each DCA-treatment and control (1 and 4 h control, n=5) time points for rat cytosol and mitochondria.

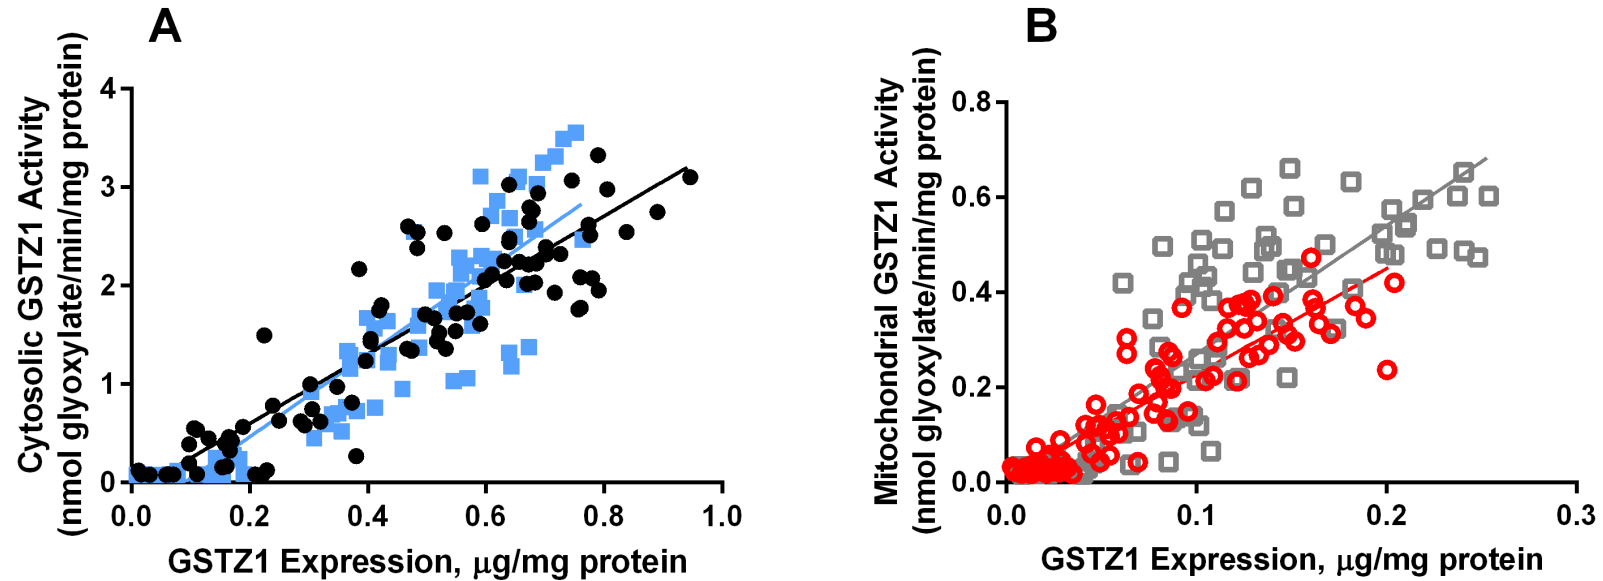

**Figure S1:** Relationship between GSTZ1 protein expression and activity. A) Correlation of expression and activity in young (black circle) and adult (blue square) rat cytosol. B) Young (open red circle) and adult (open grey square) rat mitochondrial GSTZ1 expression and activity correlation. All DCA-treated and control rats were included in this analysis,  $n=89$  for young rat cytosol and mitochondria;  $n=88$  for adult rat cytosol and mitochondria

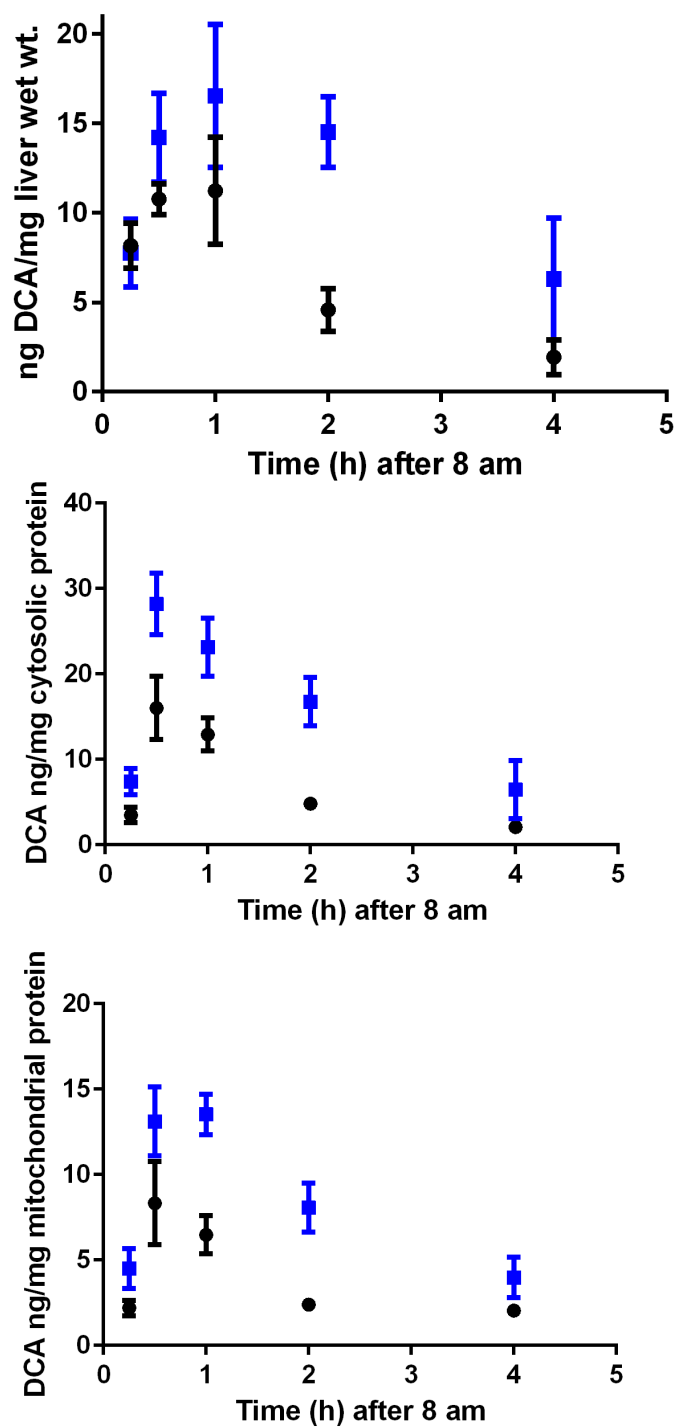

**Figure S2:** DCA concentrations in liver, cytosol and mitochondria of young (black circles) and adult (blue squares) rats at different times after the dose of DCA. Data shown are mean  $\pm$  S.D., n=6. Where no error bars are visible, replicates were very close. Concentrations were undetectable after 4h.

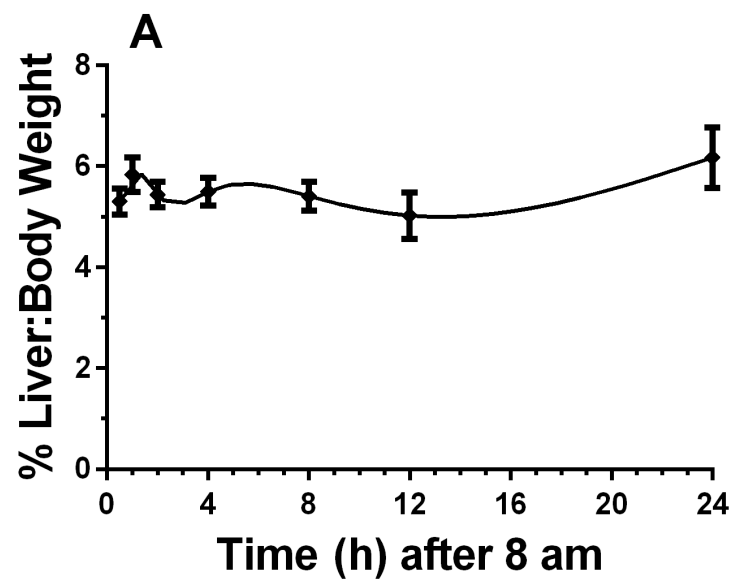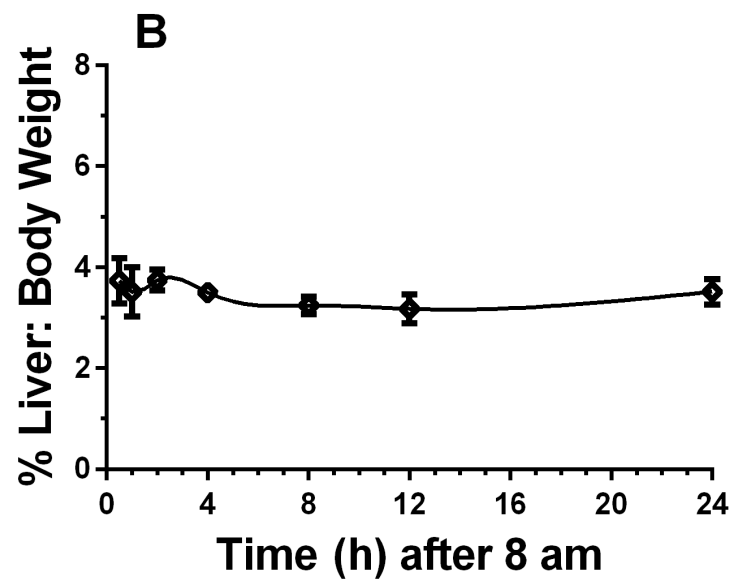

**Figure S3:** Values for liver to body weight ratio in control (sodium acetate-treated) rats over the 24 hour period after the dose. Panel A shows data for the 4-week old rats and panel B for the 52-week old rats. Values shown are mean  $\pm$  S.D., n=6



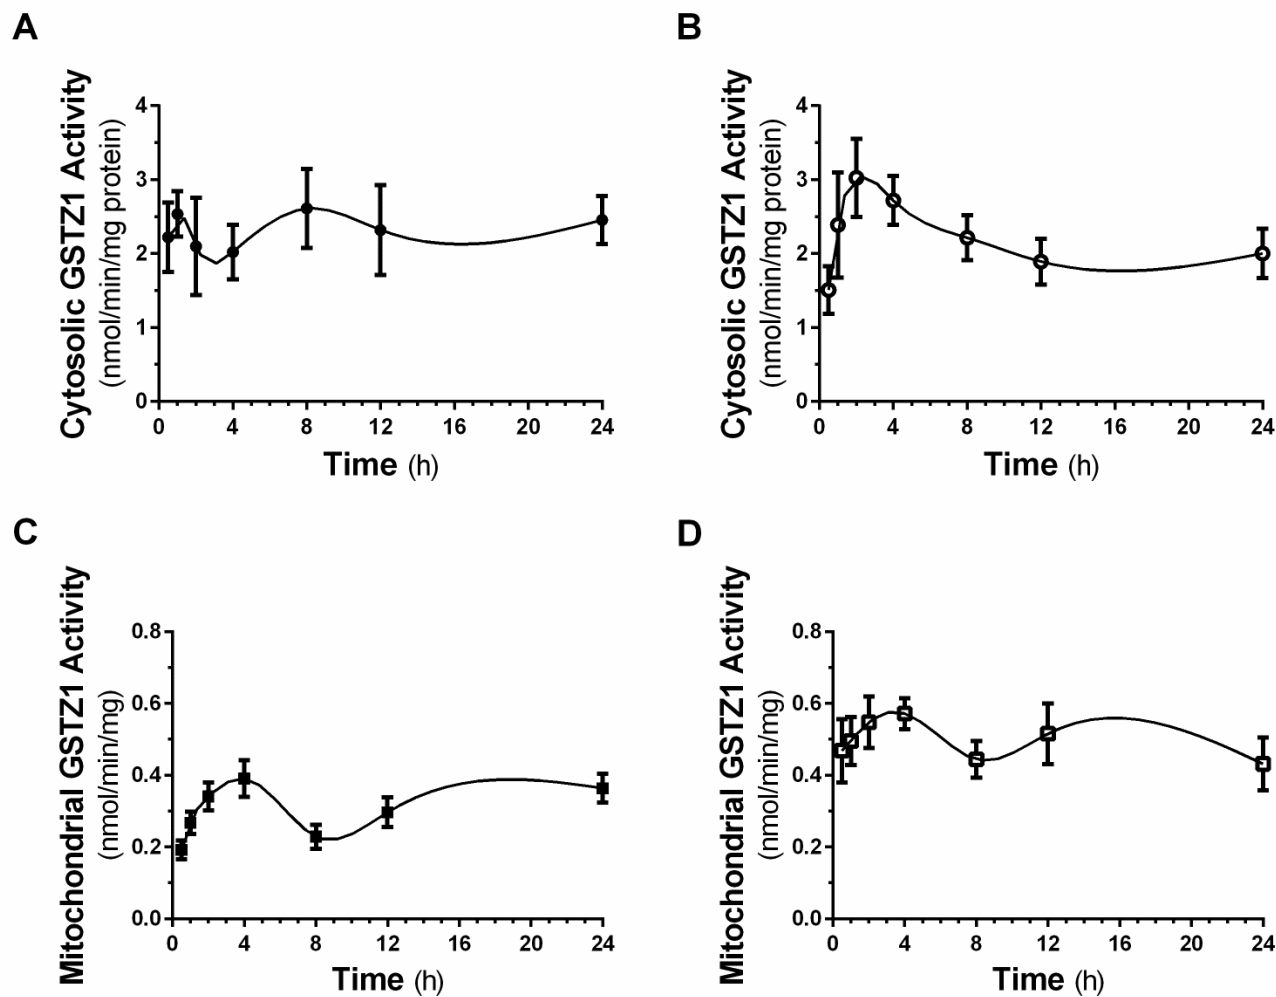

**Figure S4:** GSTZ1 activity with DCA as substrate in control rats at the times shown after the dose of sodium acetate. Data for young control rats is shown in panels A (cytosol) and C (mitochondria). Data for adult control rats are shown in panels B (cytosol) and D (mitochondria). Values shown are mean  $\pm$  S.D., n=6.

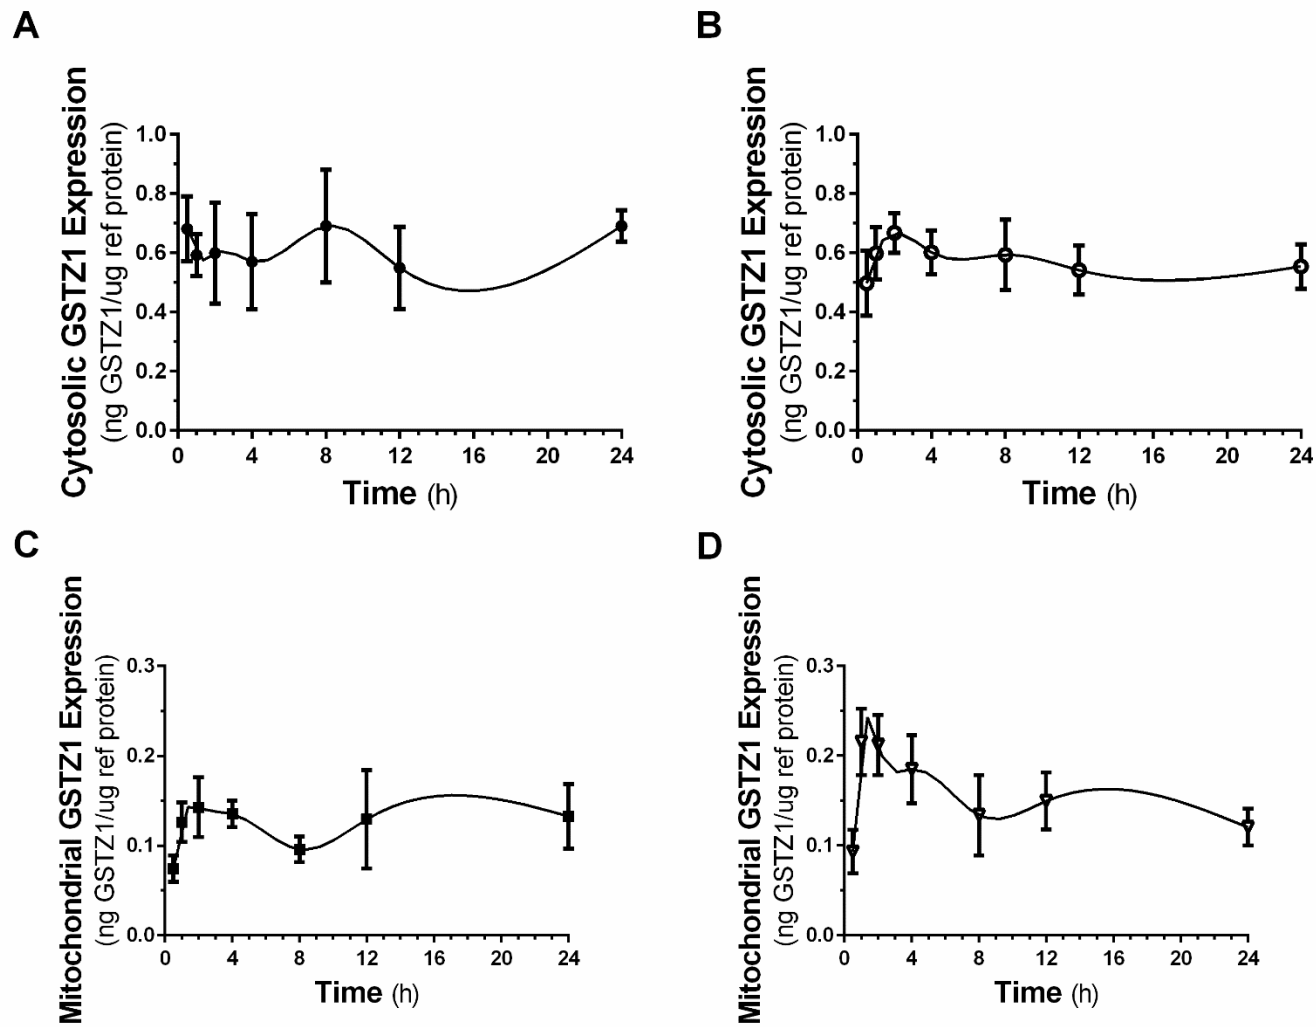

**Figure S5:** GSTZ1 expression in control rats at the times shown after the dose of sodium acetate. Data for young control rats is shown in panels A (cytosol) and C (mitochondria). Data for adult control rats are shown in panels B (cytosol) and D (mitochondria). Values shown are mean  $\pm$  S.D., n=6.
